# Supplementary material for: Lost and Found: Re-searching and Re-scoring Proteomics Data Aids Genome Annotation and Improves Proteome Coverage
Source: PubMed Central journal article supplement (PMC7593589; doi:10.1128/msystems.00833-20), 2020-10-27
Supplement: mSystems.00833-20-st001.pdf [file mSystems.00833-20-st001.pdf]

| Feature name                   | Description                                                                                              |
|--------------------------------|----------------------------------------------------------------------------------------------------------|
| <b>MS-GF+ feature set</b>      |                                                                                                          |
| RawScore                       | Raw match score of MS-GF+                                                                                |
| DeNovoScore                    | Maximum possible raw match score to this spectrum                                                        |
| ScoreRatio                     | RawScore divided by DeNovoScore                                                                          |
| Energy                         | Difference between RawScore and DeNovoScore                                                              |
| InEValue                       | Negative MS-GF+ E Value, logged                                                                          |
| InSpecEValue                   | Negative MS-GF+ Spectral E Value, logged                                                                 |
| IsotopeError                   | Number of additional neutrons in peptide                                                                 |
| InExplainedIonCurrent          | Summed intensity of identified fragment ions, divided by that of all fragment ions, logged               |
| InNTermIonCurrentRatio         | Summed intensity of identified Nt fragments divided by that of all identified fragments, logged          |
| InCTermIonCurrentRatio         | Summed intensity of identified Ct fragments, divided by that of all identified fragments, logged         |
| InMS2IonCurrent                | Summed intensity of all observed fragment ions, logged                                                   |
| ExpMass                        | Experimental peptide mass                                                                                |
| CalcMass                       | Calculated peptide mass                                                                                  |
| PepLen                         | Peptide length                                                                                           |
| dM                             | Difference between theoretical and experimental mass                                                     |
| absdM                          | Absolute value of the difference between theoretical and experimental mass                               |
| MeanErrorTop7                  | Mean of mass errors of the seven fragment ion peaks with the highest intensities                         |
| sqMeanErrorTop7                | Squared MeanErrorTop7                                                                                    |
| StdevErrorTop7                 | Stdev of mass errors of the seven fragment ion peaks with the highest intensities                        |
| ChargeN                        | Boolean, peptide charge is N                                                                             |
| enzN                           | Boolean, N-terminal agrees with enzymatic cleavage rules                                                 |
| enzC                           | Boolean, C-terminal agrees with enzymatic cleavage rules                                                 |
| enzInt                         | Number of internal cleavage sites                                                                        |
| <b>Auxiliary features</b>      |                                                                                                          |
| spec_pearson_norm <sup>a</sup> | Pearson correlation log normalized spectrum                                                              |
| dotprod_norm <sup>a</sup>      | Dot product log normalized spectrum                                                                      |
| spec_mse <sup>a</sup>          | Mean squared error normalized spectrum                                                                   |
| dRT                            | Absolute difference experimental RT and ELUDE predicted RT (in mins)                                     |
| RK                             | Number of Arg and Lys in peptide                                                                         |
| InYfrac                        | Identified Y-ions (0.01 if none) divided by number of theoretical Y-ions, logged                         |
| InBYfrac_ms2pip                | Fraction of B/Y-ions agreeing to MS <sup>2</sup> PIP-predicted absence/presence of B/Y-ion, logged       |
| InCovPos                       | Covered positions divided by peptide length – 1, logged                                                  |
| PathLen                        | Longest consecutive path BY-ions                                                                         |
| BY                             | Number of matched B/Y-ions                                                                               |
| BY_pred5perc                   | Number of matched B/Y-ions explaining at least 5% of intensity in MS <sup>2</sup> PIP-predicted spectrum |

***Combined feature set***

|                 |                              |
|-----------------|------------------------------|
| MS-GF+ features | All features described above |
| Extra features  | All features described above |
