# Supplementary material for: Lost and Found: Re-searching and Re-scoring Proteomics Data Aids Genome Annotation and Improves Proteome Coverage
Source: PubMed Central journal article supplement (PMC7593589; doi:10.1128/msystems.00833-20), 2020-10-27
Supplement: mSystems.00833-20-st002.pdf [file mSystems.00833-20-st002.pdf]

| <b>Feature Set</b> | <b>Level</b> | <b>First search</b> | <b>Second search</b> | <b>Third search</b> |
|--------------------|--------------|---------------------|----------------------|---------------------|
| MS-GF+             | Peptide      | 25,895              | 16,840               | 4,925               |
|                    | Spectra      | 574,182             | 131,456              | 15,463              |
| Auxiliary          | Peptide      | 25,494              | 17,851               | 6,099               |
|                    | Spectra      | 561,772             | 142,313              | 21,673              |
| Combined           | Peptide      | 26,440              | 19,283               | 7,585               |
|                    | Spectra      | 578,708             | 156,960              | 27,465              |
